# Supplementary material for: Developing acetylcholinesterase-based inhibition assay by modulated synthesis of silver nanoparticles: applications for sensing of organophosphorus pesticides
Source: Royal Society of Chemistry journal article supplement (doi:10.1039/c5ra10146h), 2015-01-01
Supplement: c5ra10146h1.pdf [file c5ra10146h1.pdf]

20 **Fig. S1.** Chemical structures of **A)** Trichlorfon and **B)** Malathion

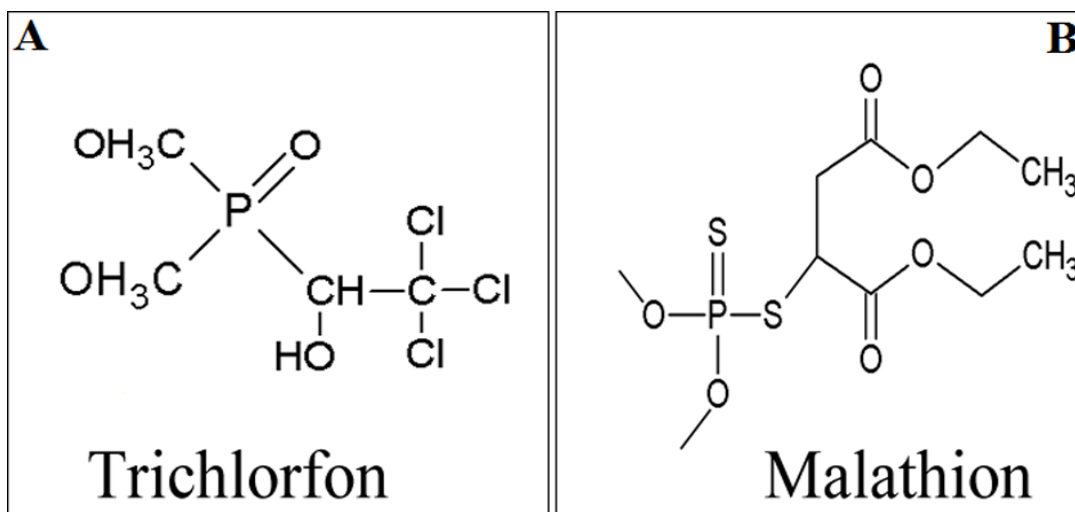

21

22 **Fig. S2. A)** FT-IR spectra of acetylthiocholine before and after interaction with citrate capped  
23 AgNPs and **B)** its secondary derivative spectra.

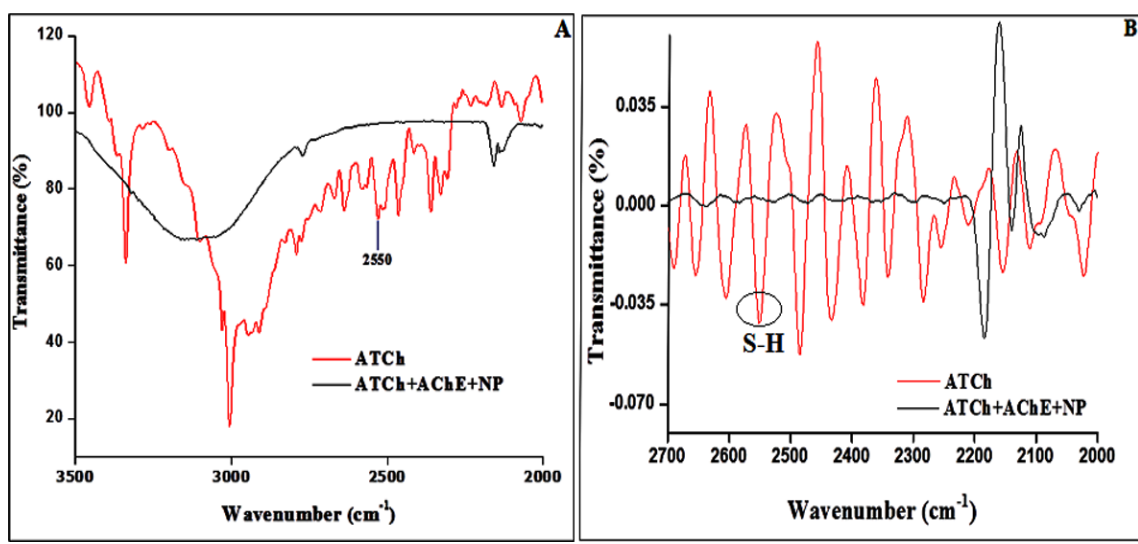

24

25

26 **Fig. S3.** Particle size distribution of AgNPs formed in the system containing AgNO<sub>3</sub> (1 mM),  
27 Na<sub>3</sub>C<sub>6</sub>H<sub>5</sub>O<sub>7</sub> (1 %), NaBH<sub>4</sub> (10 mM) **A)** AChE (100 mU mL<sup>-1</sup>) alone and **B)** ATCh (0.1 mM)  
28 alone.

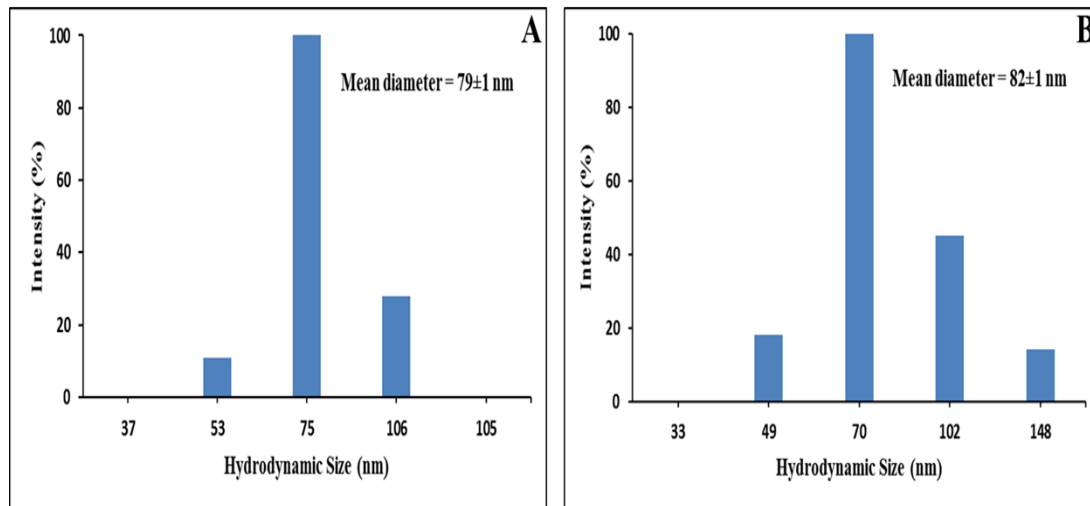

29

30 **Fig. S4.** Particle size distribution of AgNPs formed in the system containing AgNO<sub>3</sub> (1 mM),  
31 Na<sub>3</sub>C<sub>6</sub>H<sub>5</sub>O<sub>7</sub> (1 %), NaBH<sub>4</sub> (10 mM), AChE (100 mU mL<sup>-1</sup>), ATCh (0.1 mM) with **A**) trichlorfon  
32 (1 nM) and **B**) malathion (1 nM).

33

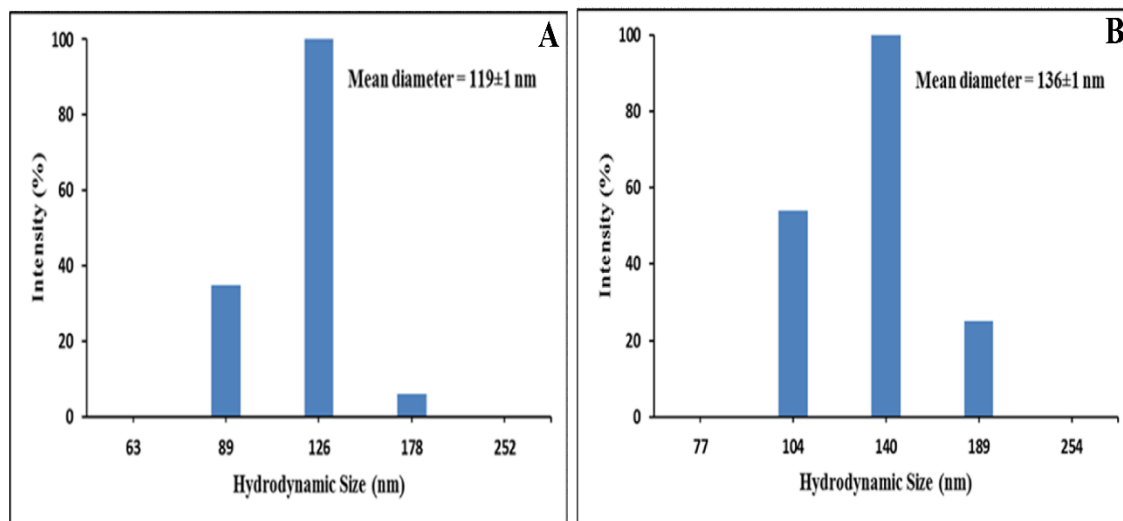

34

35 **Fig. S5.** Zeta potential value of AgNPs formed in the system containing AgNO<sub>3</sub> (1 mM),  
36 Na<sub>3</sub>C<sub>6</sub>H<sub>5</sub>O<sub>7</sub> (1 %), NaBH<sub>4</sub> (10 mM), AChE (100 mU mL<sup>-1</sup>) and ATCh (0.1 mM) with **A)**  
37 trichlorfon (1 nM) and **B)** malathion (1 nM) respectively.

38

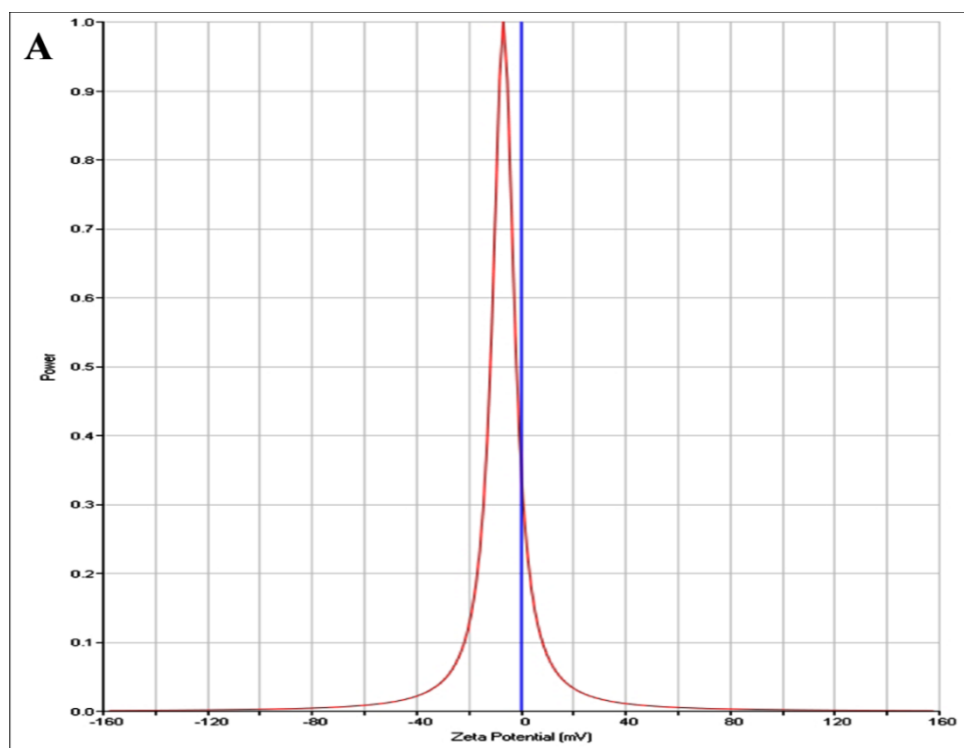

39

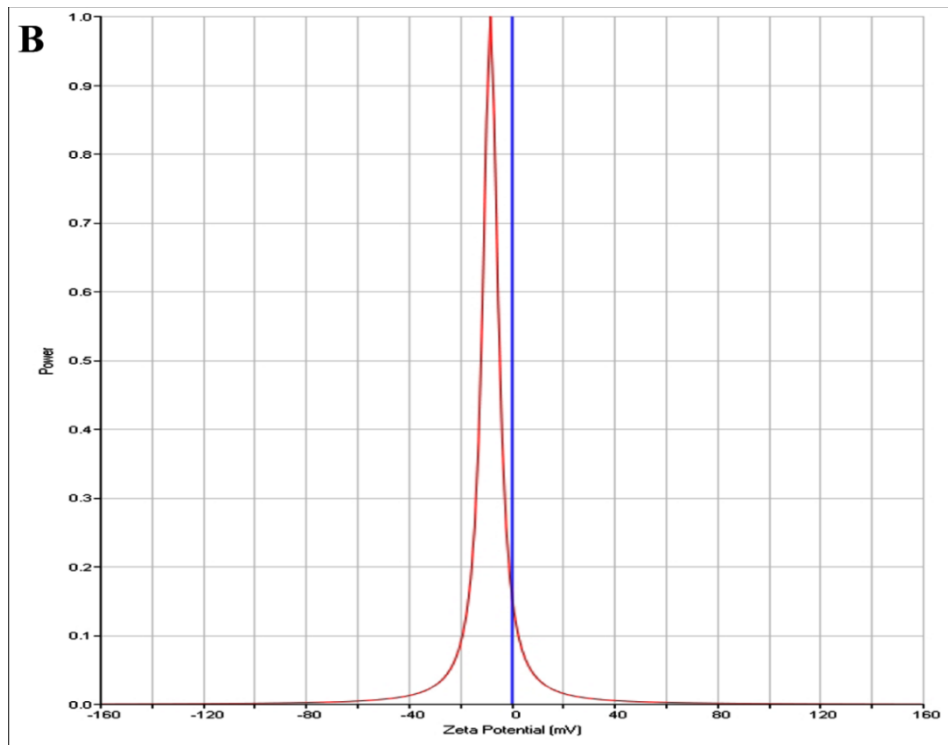

40

41

42 **Table S1.** Effect of interferences in unspiked real samples in comparison with Milli-Q water.

| Sample                       | A0<br>(unspiked<br>Real<br>samples) | A0<br>(Milli-Q<br>water) | Standard<br>error |
|------------------------------|-------------------------------------|--------------------------|-------------------|
| Agricultural<br>runoff water | 0.367                               | 0.401                    | 0.017             |
| Apple                        | 0.369                               | 0.401                    | 0.016             |
| Cabbage                      | 0.359                               | 0.401                    | 0.021             |

43
